# Supplementary material for: Proposal of Potent Inhibitors for a Bacterial Cell Division Protein FtsZ: Molecular Simulations Based on Molecular Docking and ab Initio Molecular Orbital Calculations
Source: PubMed Central journal article supplement (PMC7761175; doi:10.3390/antibiotics9120846), 2020-11-26
Supplement: antibiotics-09-00846-s001.pdf [file antibiotics-09-00846-s001.pdf]

# Supplementary Materials

## Proposal of Potent Inhibitors for a Bacterial Cell Division Protein FtsZ: Molecular Simulations Based on Molecular Docking and *ab Initio* Molecular Orbital Calculations

Shohei Yamamoto <sup>1</sup>, Ryosuke Saito <sup>1</sup>, Shunya Nakamura <sup>1</sup>, Haruki Sogawa <sup>1</sup>, Pavel Karpov <sup>2</sup>, Sergey Shulga <sup>2</sup>, Yaroslav Blume <sup>2</sup> and Noriyuki Kurita <sup>1,\*</sup>

<sup>1</sup> Department of **Computer Science and Engineering**, Toyohashi University of Technology, Tempaku-cho, Toyohashi, Aichi 441-8580, Japan; yamamoto@klab.cs.tut.ac.jp (S.Y.); saito@klab.cs.tut.ac.jp (R.S.); nakamura@klab.cs.tut.ac.jp (S.N.); sogawaharuki@gmail.com (H.S.)

<sup>2</sup> Institute of Food Biotechnology and Genomics, National Academy of Sciences of Ukraine, 2a, Osypovskogo str., Kyiv-123, Kyiv 04123, Ukraine; karpov@ifbg.org.ua (P.K.); Shulga5@i.ua (S.S.); blume.yaroslav@nas.gov.ua (Y.B.)

\* Correspondence: kurita@cs.tut.ac.jp; Tel.: +81-532-44-6875

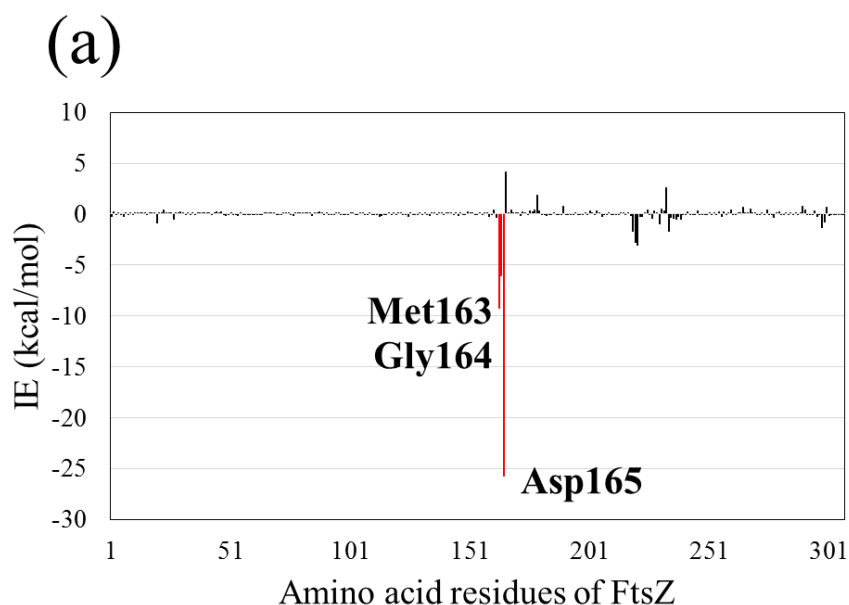

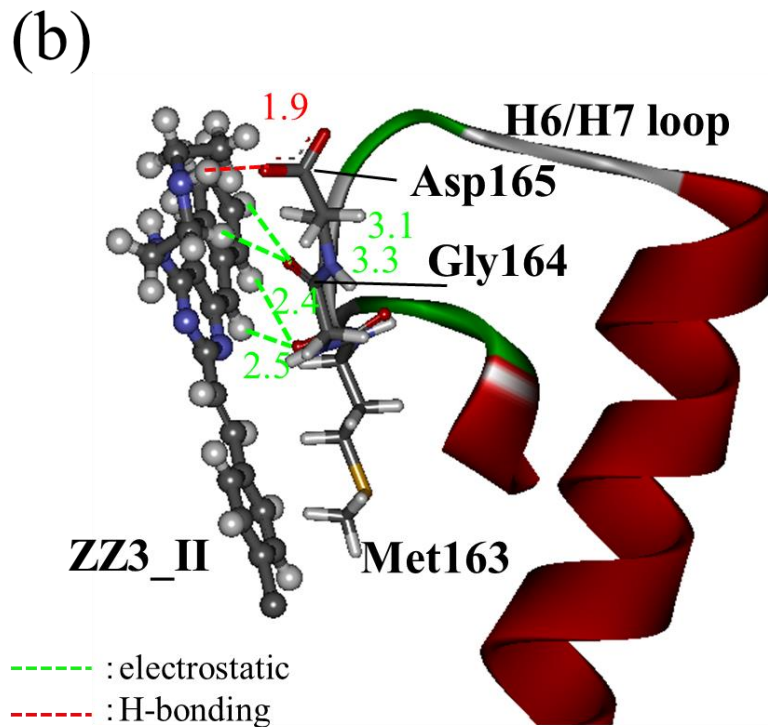

**Figure S1.** (a) Interaction energies (IE) and (b) an interacting structure between ZZ3\_II and FtsZ residues.

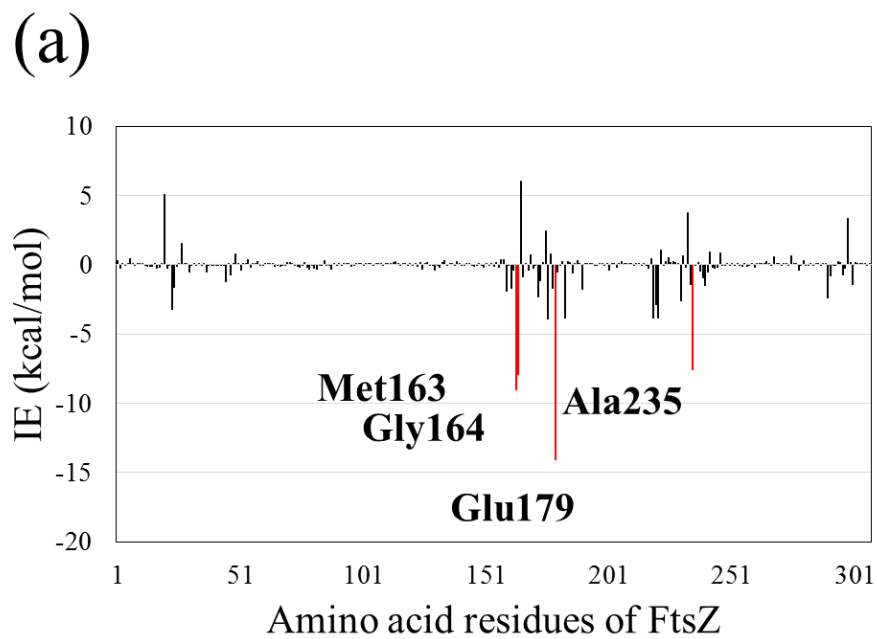

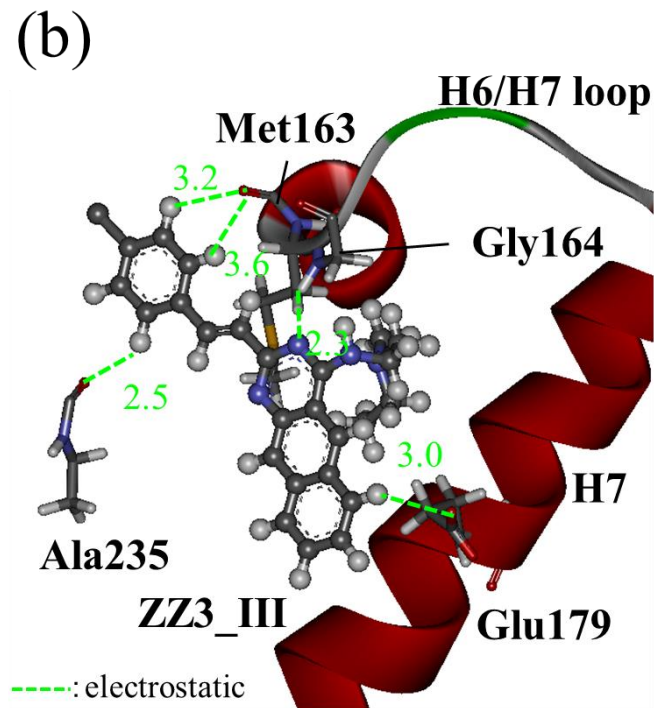

**Figure S2.** (a) Interaction energies (IE) and (b) an interacting structure between ZZ3\_III and FtsZ residues.

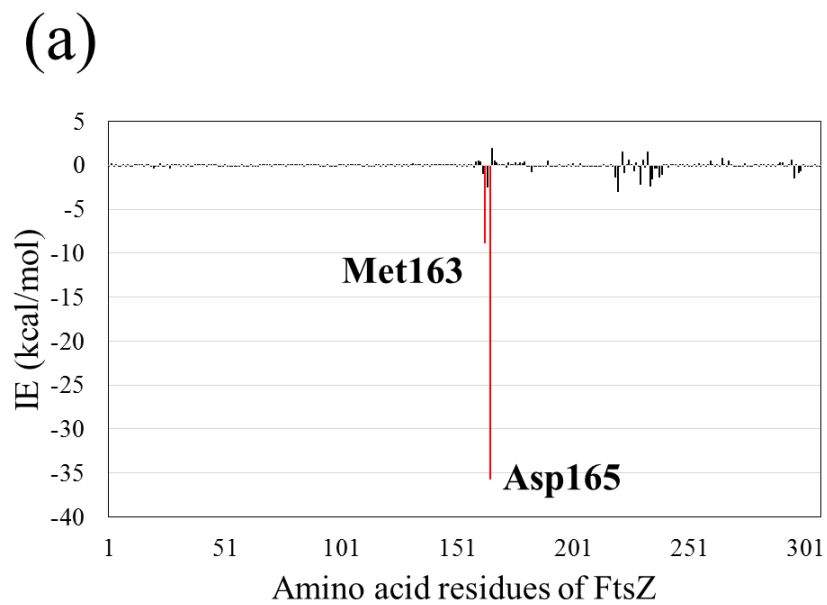

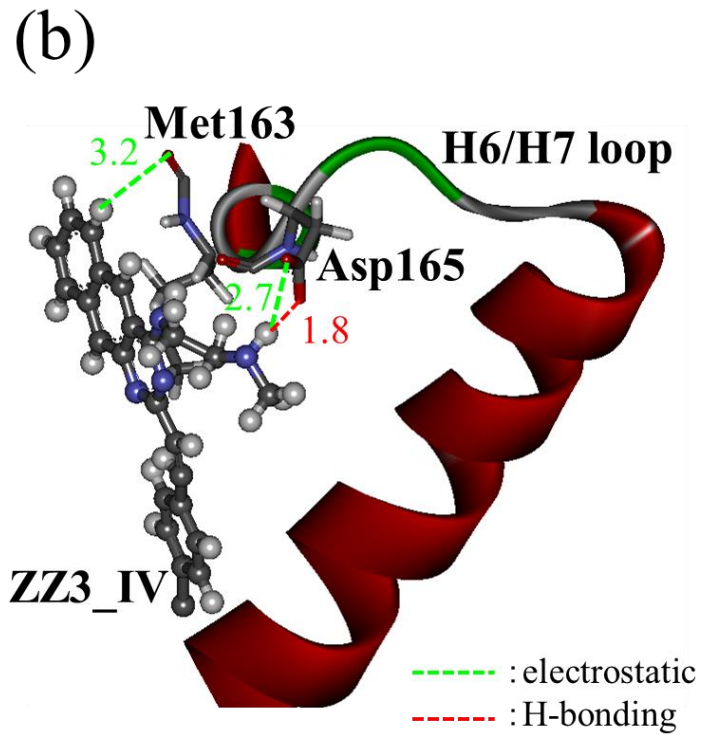

**Figure S3.** (a) Interaction energies (IE) and (b) an interacting structure between ZZ3\_IV and FtsZ residues.

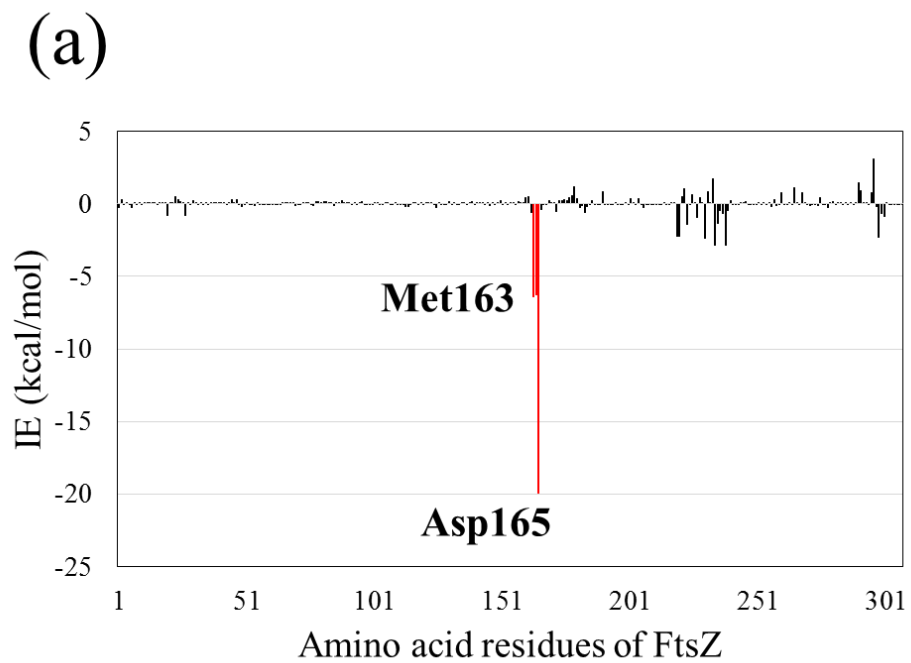

(b)

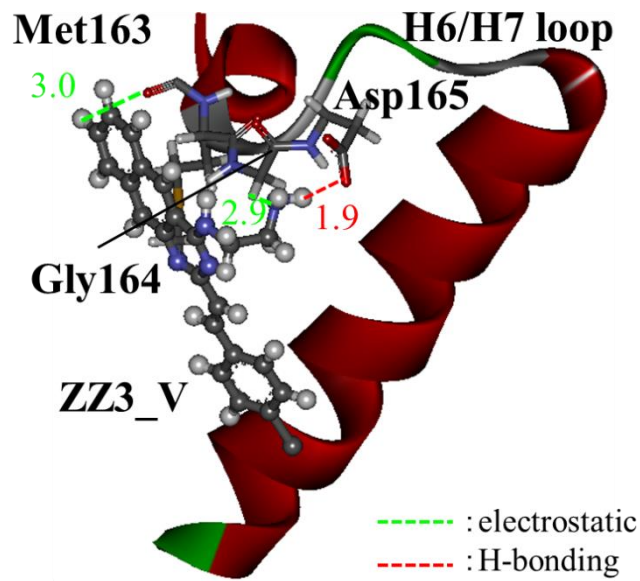

**Figure S4.** (a) Interaction energies (IE) and (b) an interacting structure between ZZ3\_V and FtsZ residues.

(a)

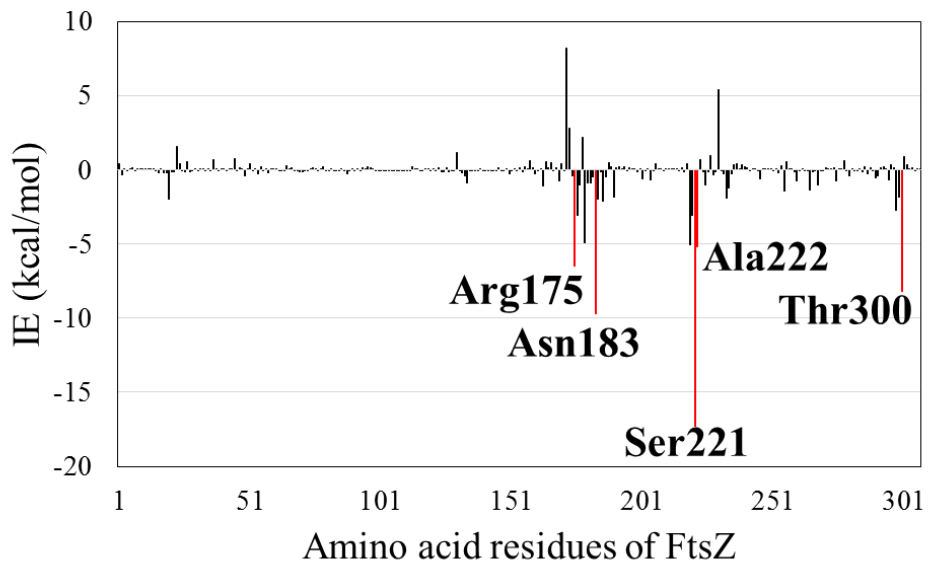

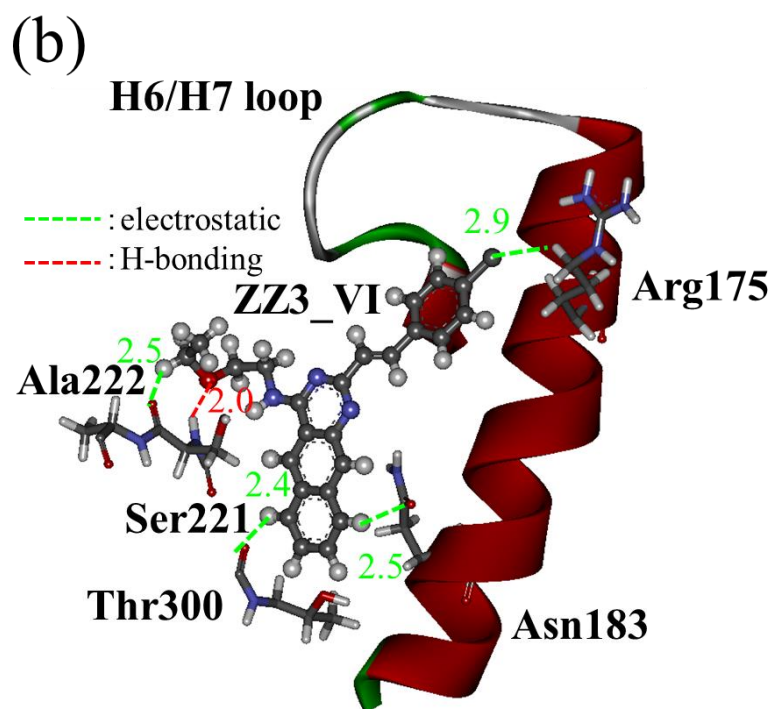

**Figure S5.** (a) Interaction energies (IE) and (b) an interacting structure between ZZ3\_VI and FtsZ residues.

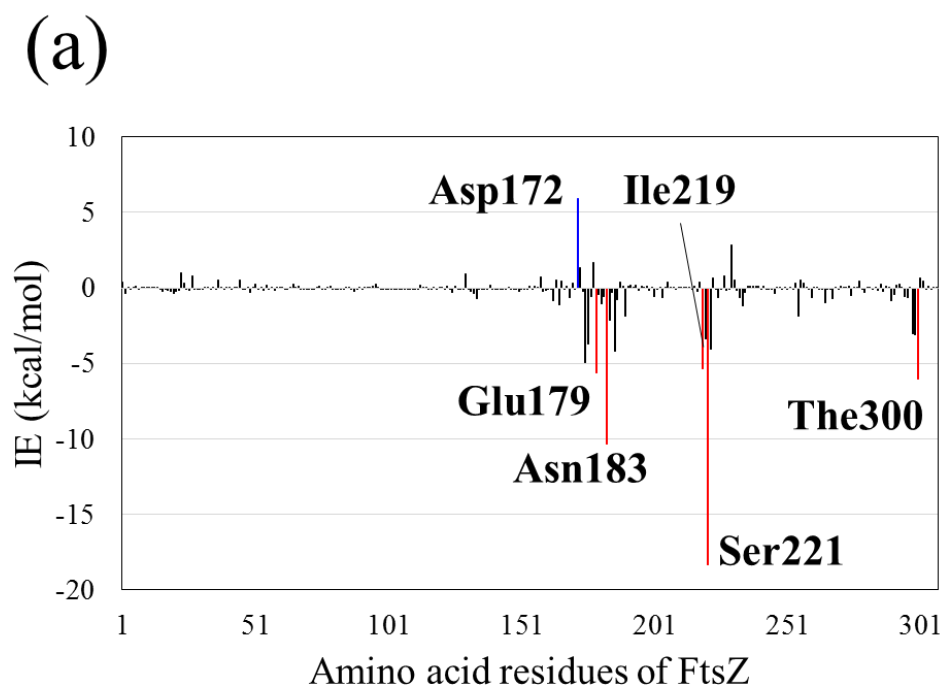

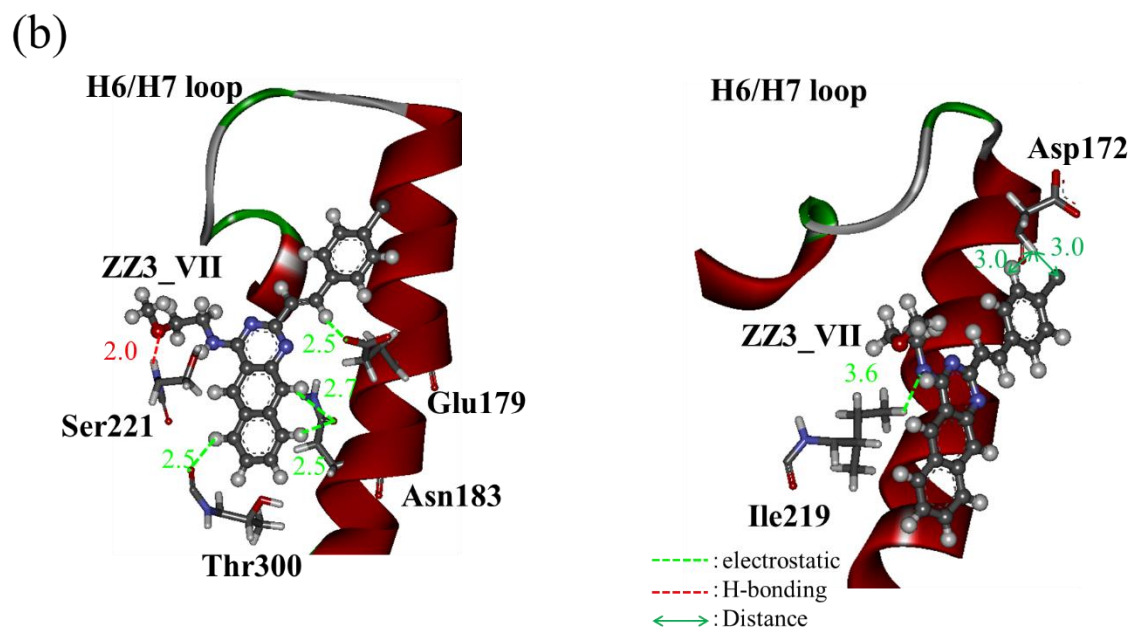

**Figure S6.** (a) Interaction energies (IE) and (b) interacting structures between ZZ3\_VII and FtsZ residues.

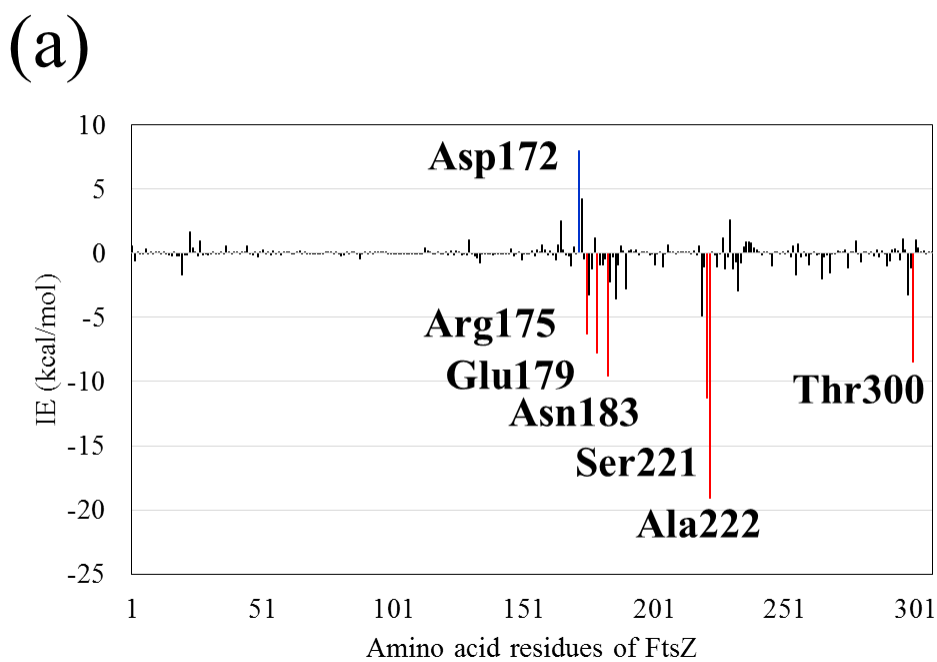

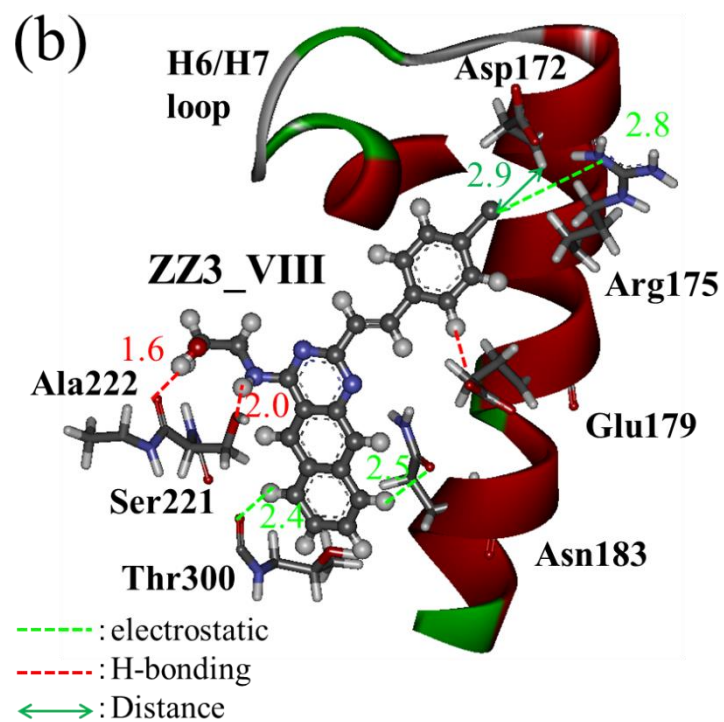

**Figure S7.** (a) Interaction energies (IE) and (b) an interacting structure between ZZ3\_VIII and FtsZ residues.

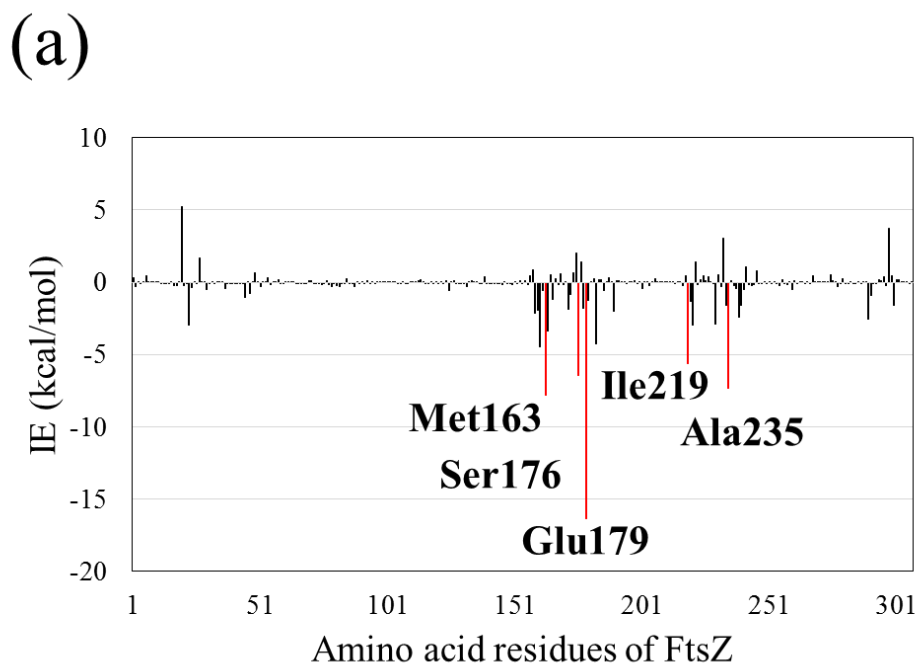



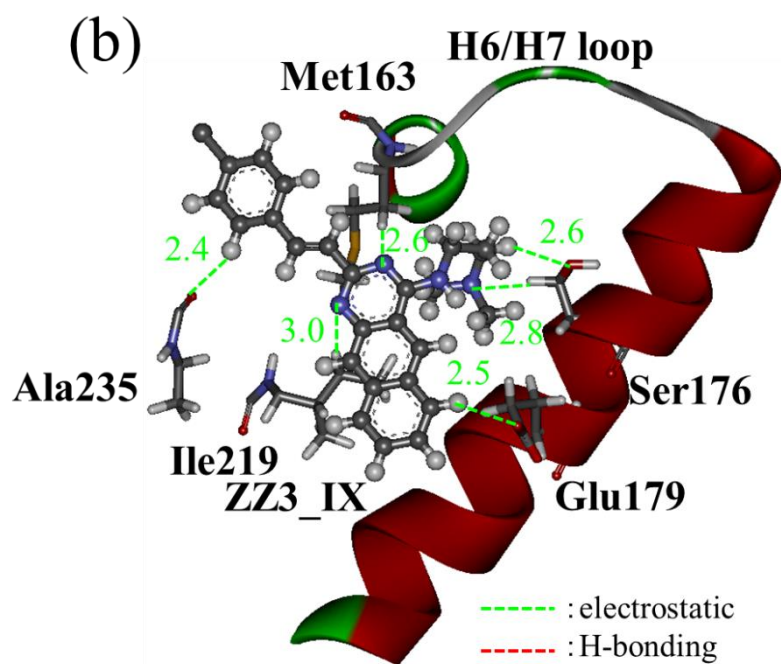

**Figure S8.** (a) Interaction energies (IE) and (b) an interacting structure between ZZ3\_IX and FtsZ residues.

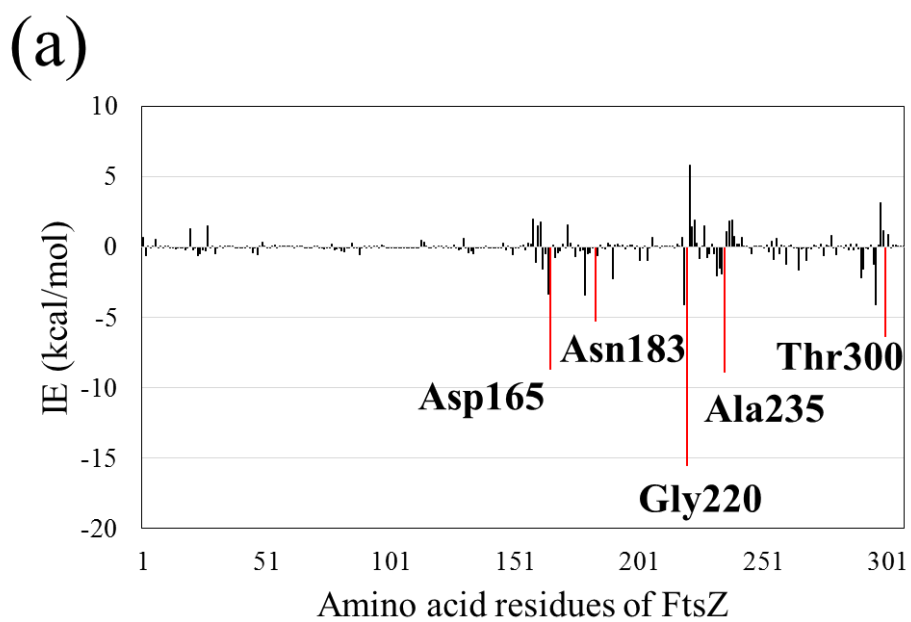

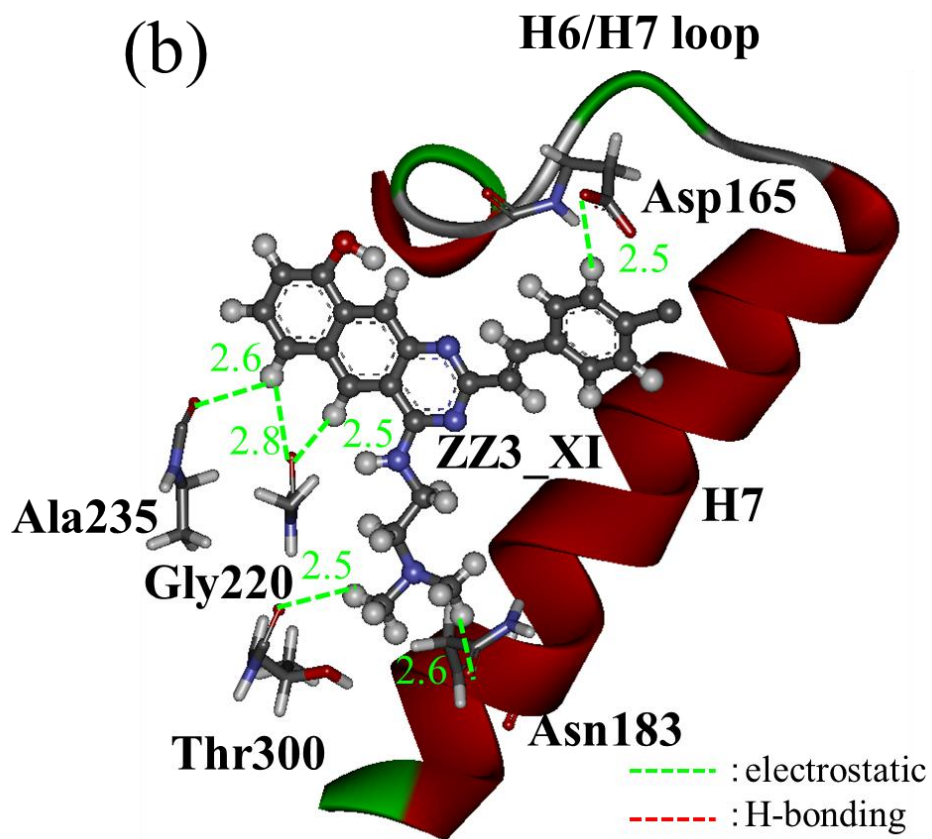

**Figure S9.** (a) Interaction energies (IE) and (b) an interacting structure between ZZ3\_XI and FtsZ residues.

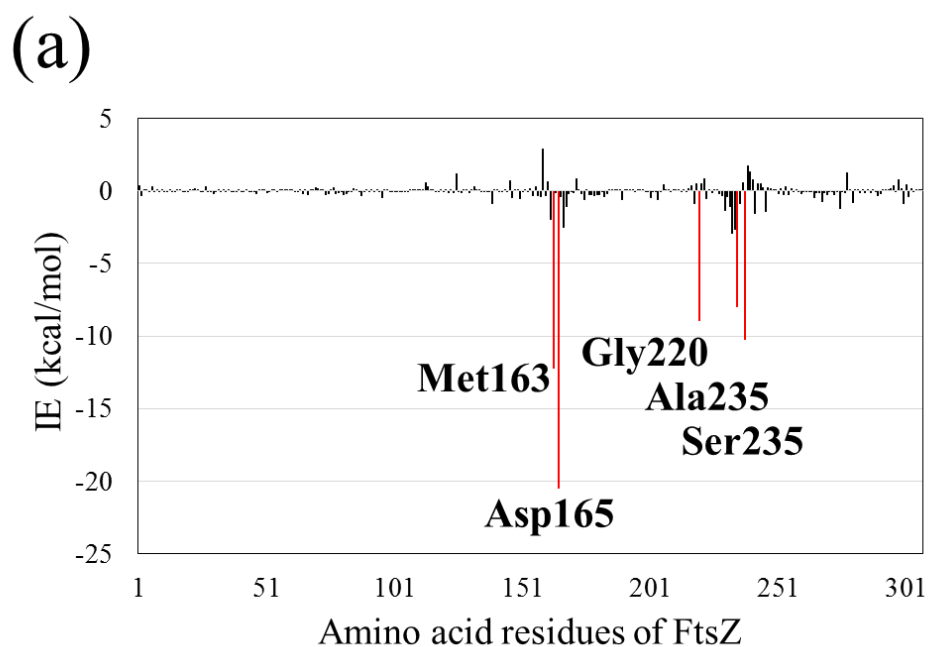

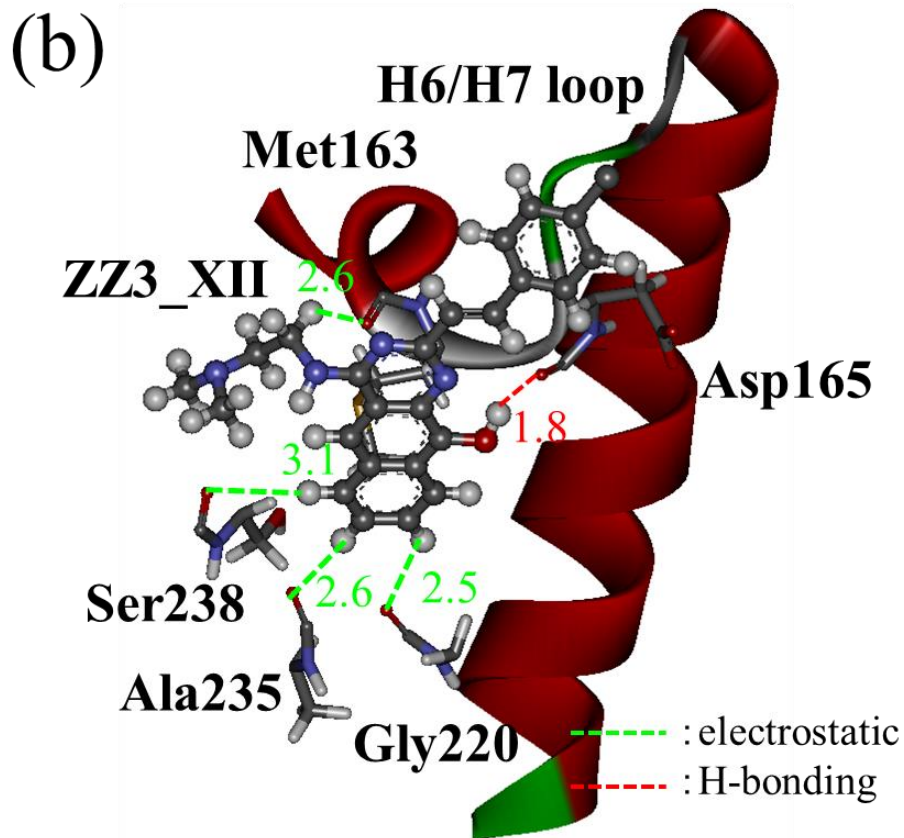

**Figure S10.** (a) Interaction energies (IE) and (b) an interacting structure between ZZ3\_XII and FtsZ residues.

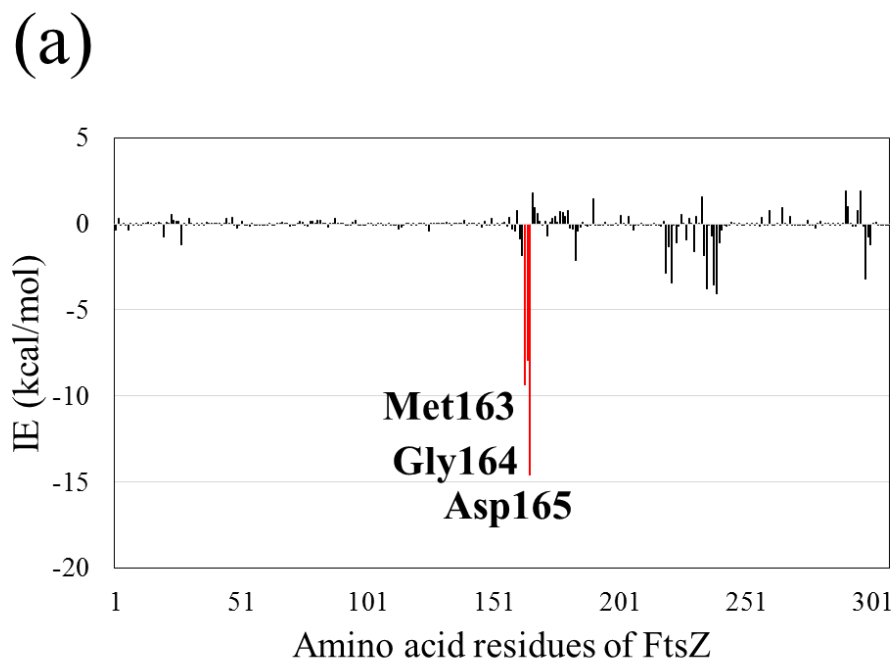

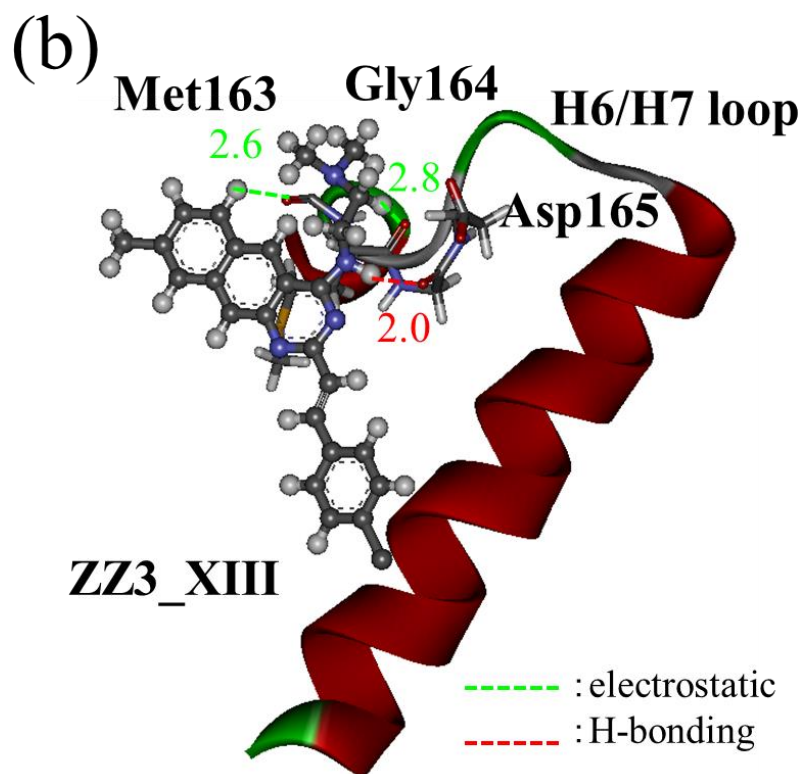

**Figure S11.** (a) Interaction energies (IE) and (b) an interacting structure between ZZ3\_XIII and FtsZ residues.

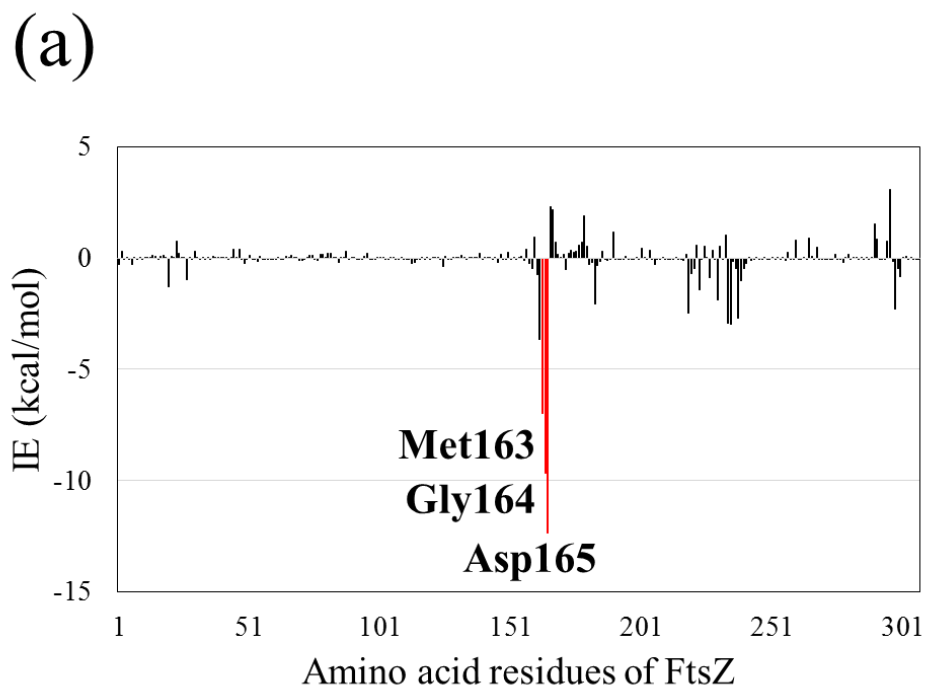

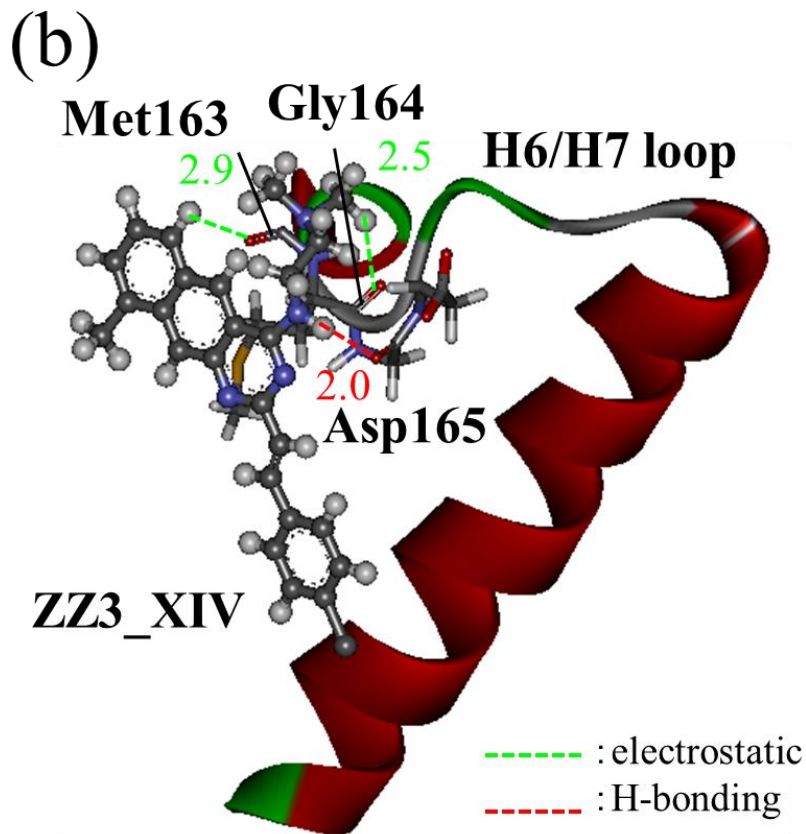

**Figure S12.** (a) Interaction energies (IE) and (b) an interacting structure between ZZ3\_XIV and FtsZ residues.

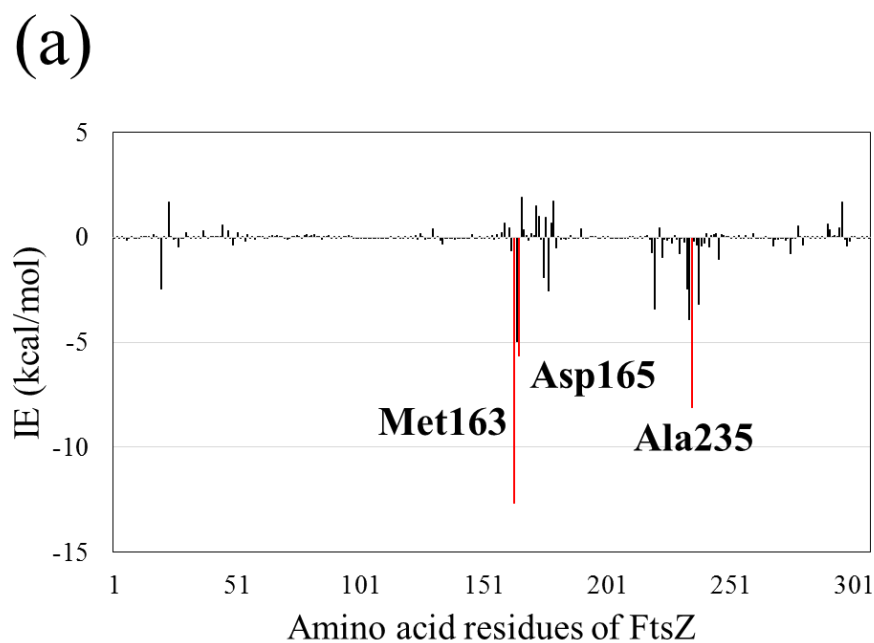

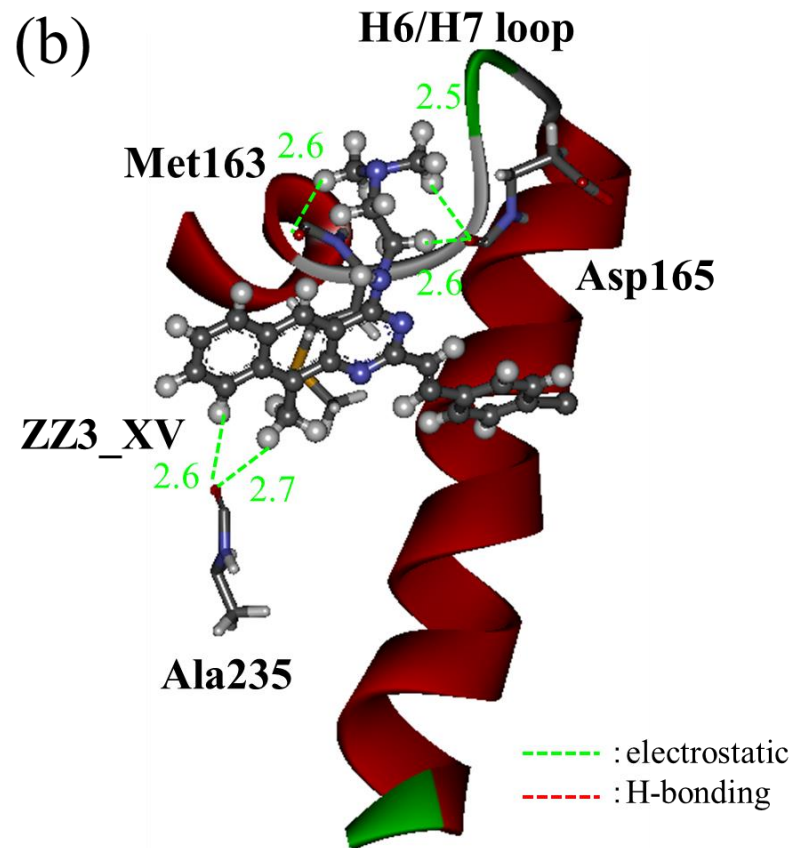

**Figure S13.** (a) Interaction energies (IE) and (b) an interacting structure between ZZ3\_XV and FtsZ residues.
